# Supplementary material for: Identification and Characterization of MicroRNAs Controlled by the Osteoblast-Specific Transcription Factor Osterix
Source: PLoS One. 2013 Mar 5;8(3):e58104. doi: 10.1371/journal.pone.0058104 (PMC3589352; doi:10.1371/journal.pone.0058104)
Supplement: Table S1 — Up-regulation of miRNAs in miRNA array chips. (XLS) [file pone.0058104.s002.xls]

## Sheet: Sheet1
Table S1: Up-regulation of miRNAs in miRNA array chips
Name	Accession	Chromosome	FoldChange (Osx-/- vs Wt)	P value.raw
mmu-let-7e	MI0000561	17	2.001	0.081
mmu-miR-125b-5p	MI0000725	9	2.082	0.071
mmu-miR-133a	MI0000159	18	2.411	0.052
mmu-mir-128b-P	MI0000155	1	2.251	0.077
mmu-miR-190b	MI0005478	3	5.331	0.003
mmu-miR-193b	MI0005484	16	2.448	0.058
mmu-miR-204	MI0000247	19	4.165	0.047
mmu-miR-211	MI0000708	7	2.613	0.054
mmu-miR-302a	MI0000402	3	11.032	0.083
mmu-miR-323-3p	MI0000592	12	6.221	0.059
mmu-miR-377	MI0000794	12	2.601	0.061
mmu-miR-409-3p	MI0001160	12	2.328	0.072
mmu-miR-411*	MI0001163	12	2.421	0.068
mmu-miR-431	MI0001524	12	2.516	0.045
mmu-miR-433	MI0001525	12	2.287	0.073
mmu-miR-483	MI0003484	7	2.495	0.029
mmu-miR-501-5p	MI0004703	X	2.095	0.077
mmu-miR-544	MI0005555	12	3.478	0.066
